# Supplementary material
Source: ML conference proceedings conference paper supplement (https://openreview.net/forum?id=MbQKovZFHIH)

# context aggregation

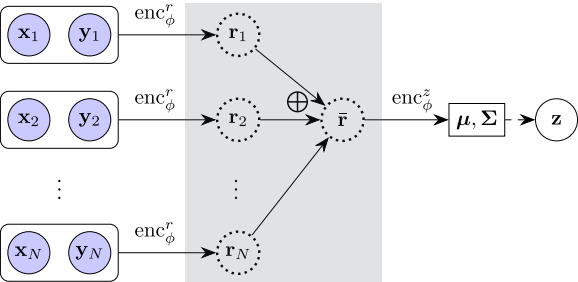

Supplement: supplementary_material [file attachment]

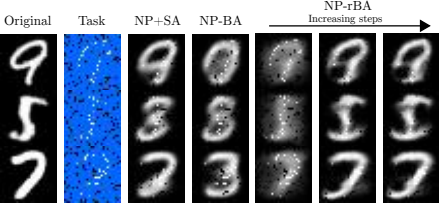

Supplement: supplementary_material [file attachment]

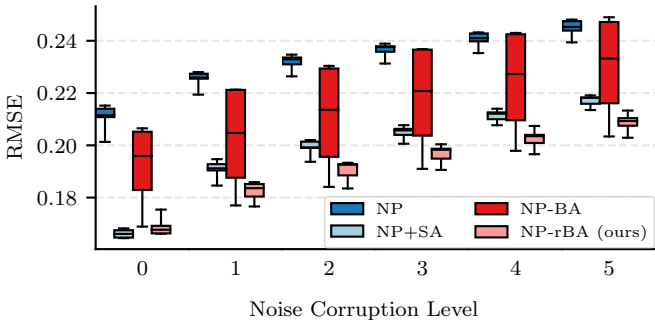

Supplement: supplementary_material [file attachment]

## Matern

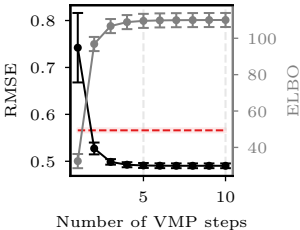

Supplement: supplementary_material [file attachment]

# EMNIST

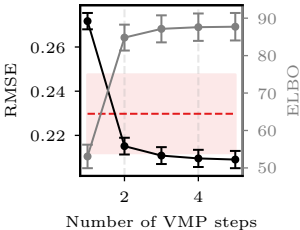

Supplement: supplementary_material [file attachment]

# Matern

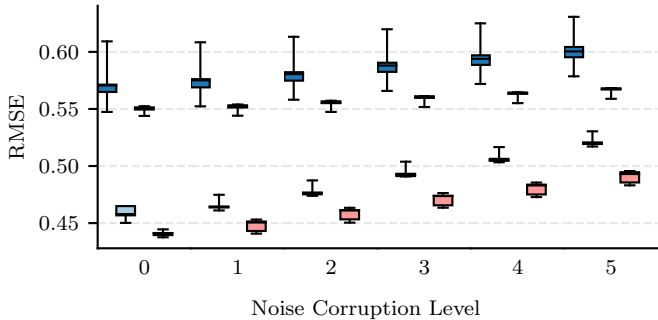

Supplement: supplementary_material [file attachment]

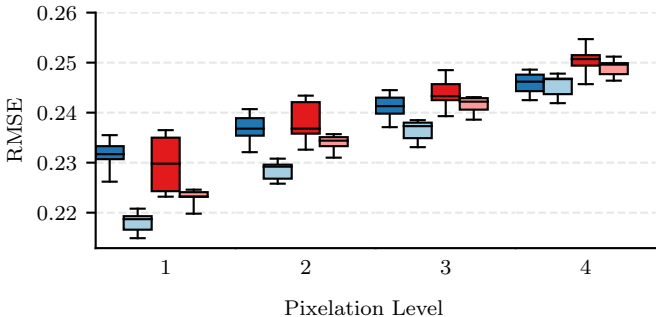

Supplement: supplementary_material [file attachment]

# RBF

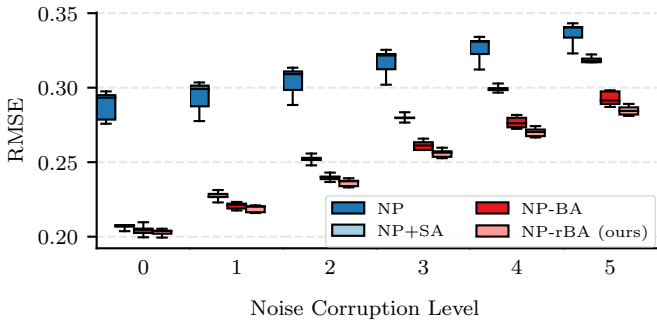

Supplement: supplementary_material [file attachment]

## Unseen classes

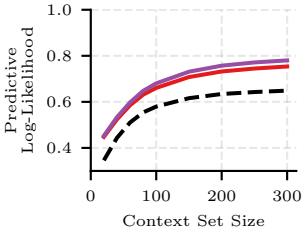

Supplement: supplementary_material [file attachment]

## Seen classes

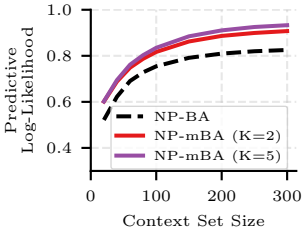

Supplement: supplementary_material [file attachment]

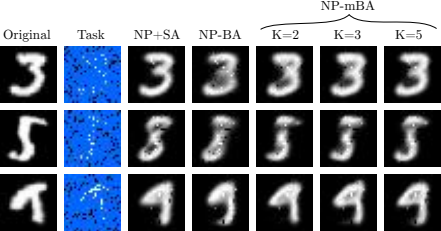

Supplement: supplementary_material [file attachment]

graphical model

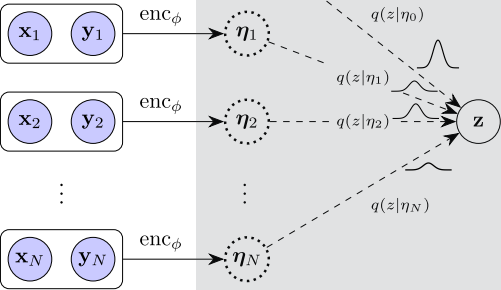

Supplement: supplementary_material [file attachment]
